# Supplementary material for: Tracking 21st century anthropogenic and natural carbon fluxes through model-data integration
Source: PubMed Central journal article supplement (PMC9512848; doi:10.1038/s41467-022-32456-0), 2022-09-26
Supplement: 41467_2022_32456_MOESM1_ESM.pdf [file 41467_2022_32456_MOESM1_ESM.pdf]

1       **Supplementary materials: Tracking**  
2           **21<sup>st</sup> century anthropogenic and**  
3           **natural carbon fluxes through**  
4           **model-data integration**

5       Selma Bultan<sup>\*1</sup>, Julia E.M.S. Nabel<sup>2,3</sup>, Kerstin Hartung<sup>a1</sup>, Raphael  
6       Ganzenmüller<sup>1</sup>, Liang Xu<sup>b4</sup>, Sassan Saatchi<sup>4</sup>, and Julia Pongratz<sup>1,2</sup>

7       <sup>1</sup>*Department of Geography, Ludwig-Maximilians-Universität, Munich, Germany*

8                   <sup>2</sup>*Max Planck Institute for Meteorology, Hamburg, Germany*

9                   <sup>3</sup>*Max Planck Institute for Biogeochemistry, Jena, Germany*

10       <sup>4</sup>*Jet Propulsion Laboratory, California Institute of Technology, Pasadena, CA, USA*

11       <sup>a</sup>*Now at: Deutsches Zentrum für Luft- und Raumfahrt, Institut für Physik der*  
12                   *Atmosphäre, Oberpfaffenhofen, Germany*

13                   <sup>b</sup>*Now at: Pachama Inc., San Francisco, CA, USA*

14       **\*Correspondence: selma.bultan@lmu.de**

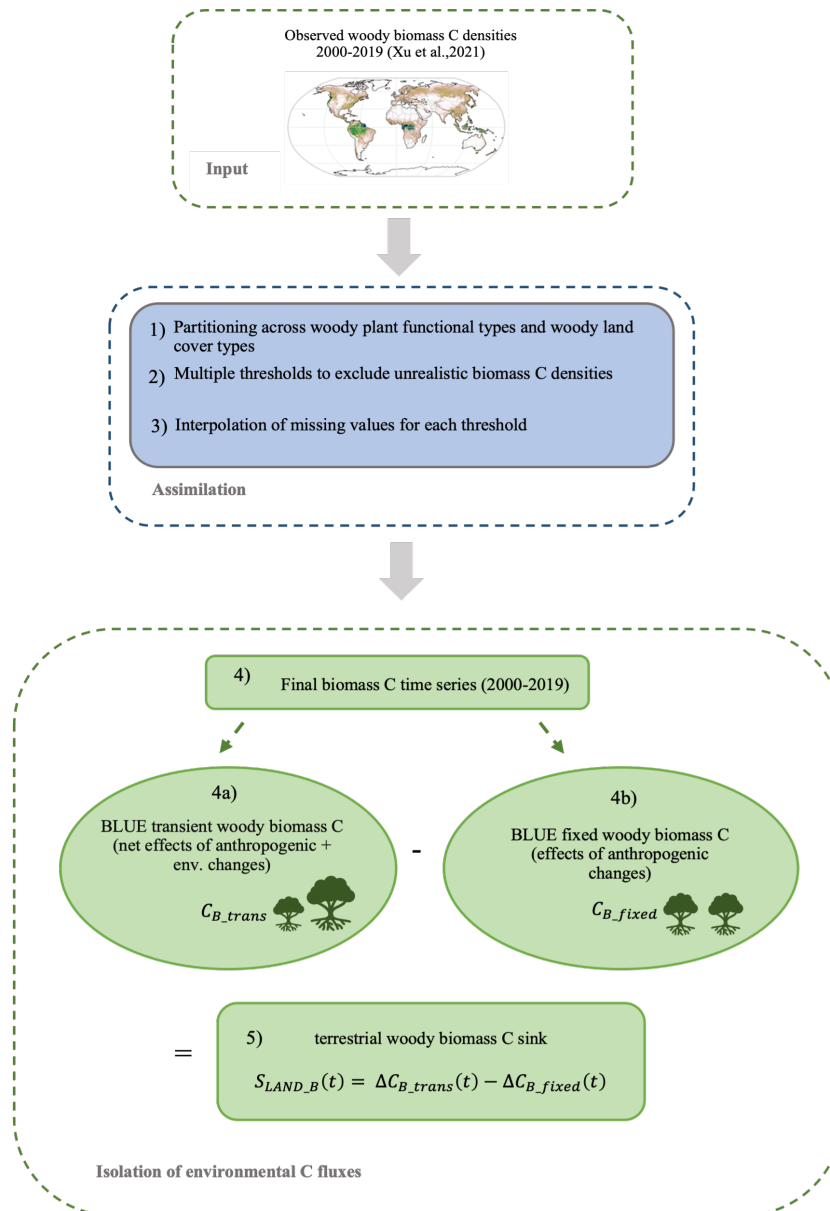

**Supplementary Figure 1: Schematic overview of the model-data assimilation framework used to isolate environmental terrestrial carbon sources and sinks ( $=S_{LAND}$ ). The individual steps (1-5) are explained in Section 2. Pre- and post-processing steps are shown by filled squared boxes. Filled circles represent the model simulations.**

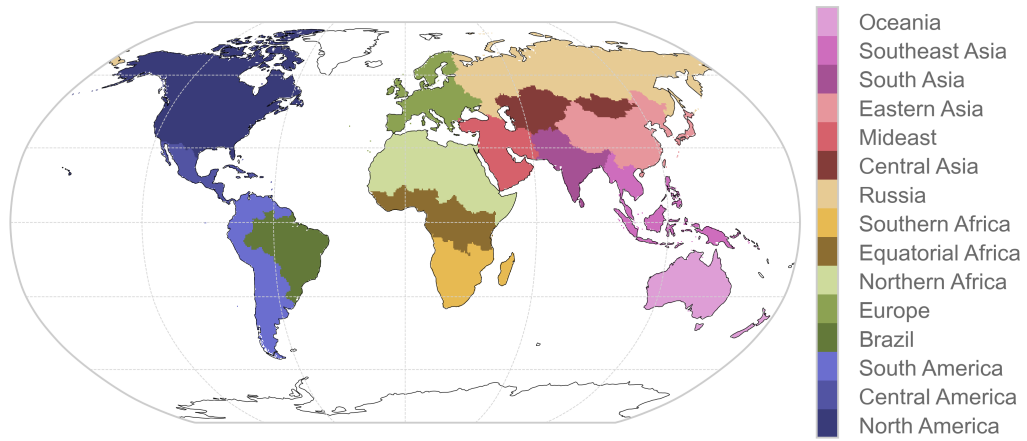

**Supplementary Figure 2: Spatial distribution of the 15 regions used for aggregating the model results.** The region definitions are based on the RECCAP-2 project, but we further aggregated Northern South America and Southwest South America to South America and aggregated China, Korea and Japan as Eastern Asia.

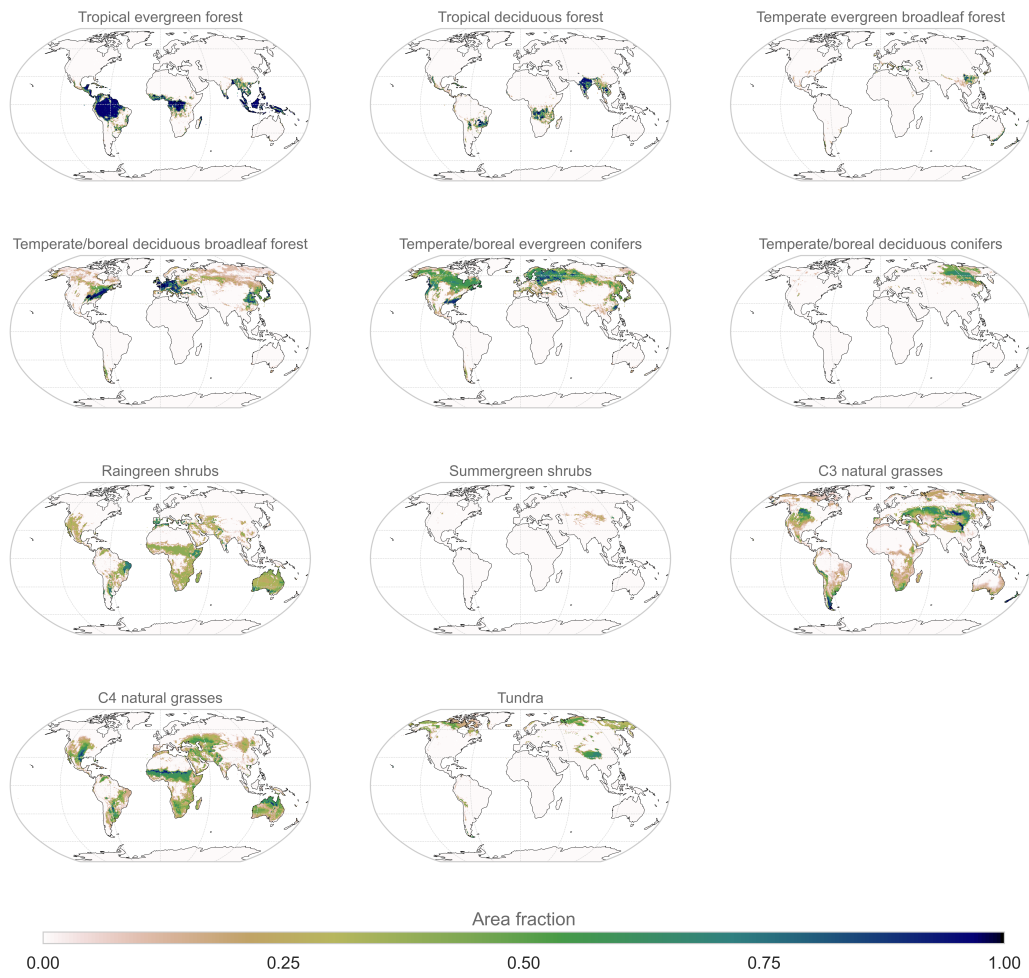

**Supplementary Figure 3:** Fractional grid cell area covered by each of the eleven natural vegetation types (“Plant Functional Type”) in BLUE.

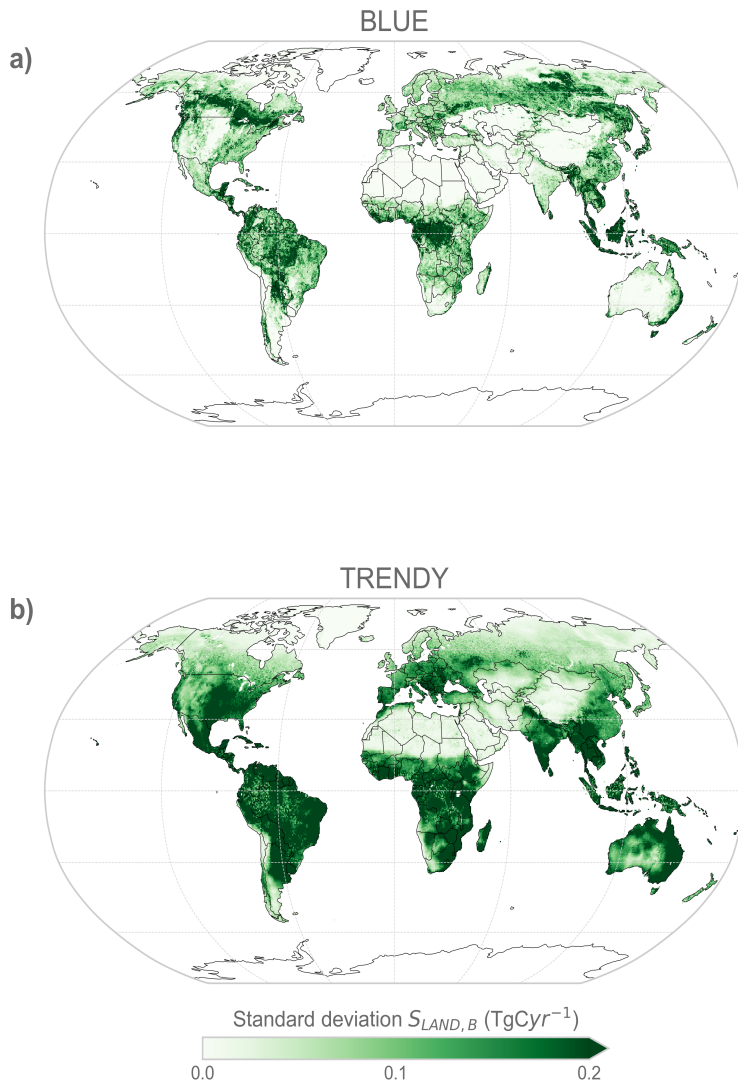

**Supplementary Figure 4: Spatial comparison of the interannual variability of  $S_{LAND,B}$  between BLUE (a) (woody vegetation) and the average of 13 TRENDY DGVMs (b) (all vegetation types). The interannual variability is calculated as standard the deviation between 2000 and 2018 to emphasize areas with high absolute values of  $S_{LAND,B}$  and a large interannual variability.**

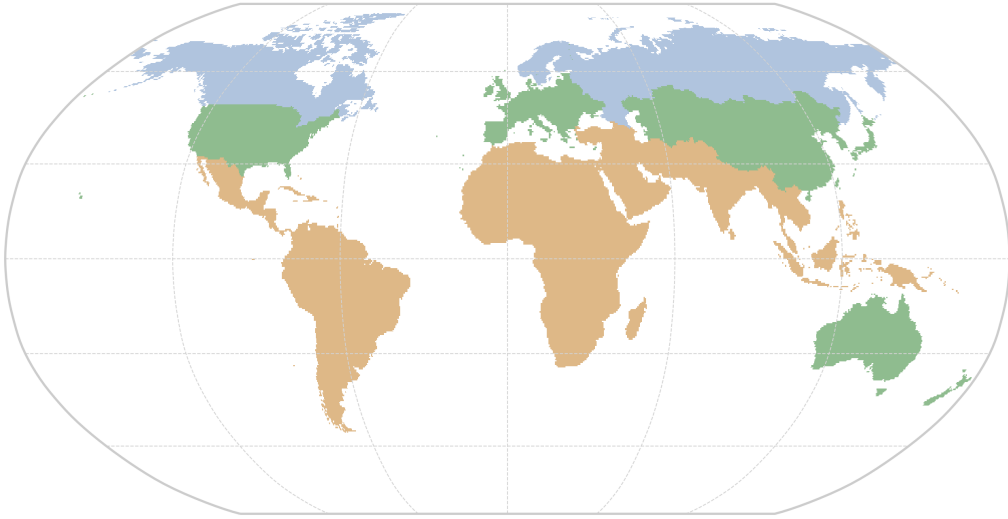

**Supplementary Figure 5: Global map of different biomes.** The biomes were used for aggregating the forest biomass carbon stocks (Tab. 2). The boreal biome is visualized in blue, the temperate biome is shown in green and the tropical biome is shown in light brown. The biome mask is based on the RECCAP-2 regions map (Supplementary Fig. 2), which is further aggregated according to the definitions by [1].

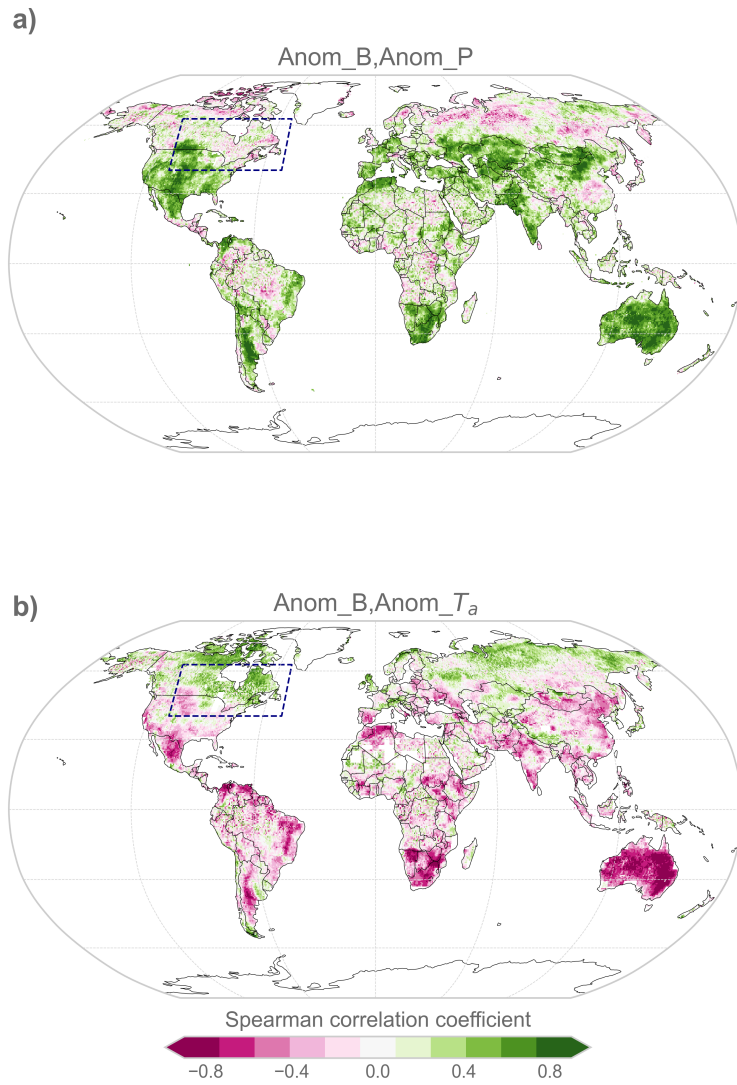

**Supplementary Figure 6: Spatial correlation between annual anomalies of climate variables and biomass carbon.** The global maps show the Spearman correlation coefficient between the time series of biomass carbon anomalies (as opposed to woody biomass carbon anomalies in Fig. 2) as estimated by averaging over eight TRENDY DGVMs (prior to the correlation analysis for the S3 setup) and the time series of a) precipitation (P) anomalies and b) air temperature (T<sub>a</sub>) anomalies. The climate variables are taken from ERA-5 reanalysis data. The anomalies are calculated by detrending each variable. The dark blue frame denotes parts of the North American boreal forest, where we find a strong positive correlation between detrended annual air temperature anomalies and detrended annual biomass carbon anomalies in our BLUE estimates (Supplementary Fig. 7).

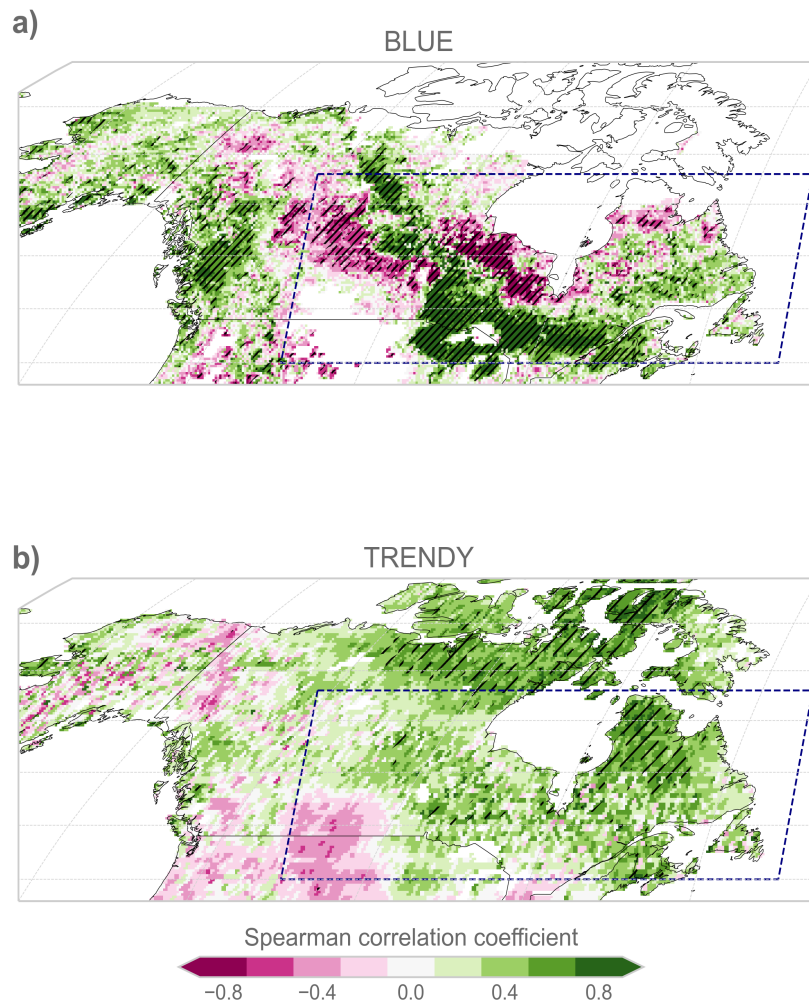

**Supplementary Figure 7: Spatial correlation between annual anomalies of climate variables and biomass carbon in North America** The maps show the Spearman annual anomalies of climate variables biomass carbon anomalies and the time series of air temperature ( $T_a$ ) anomalies. The BLUE estimate is shown in a) and the TRENDY estimate (correlation is calculated as average biomass carbon over eight DGVMs from the S3 setup) is shown in b). Significance is tested with a two-tailed t-test and significant correlations ( $p < 0.05$ ) are visualized by hatched areas. The dark blue frame denotes parts of the North American boreal forest.



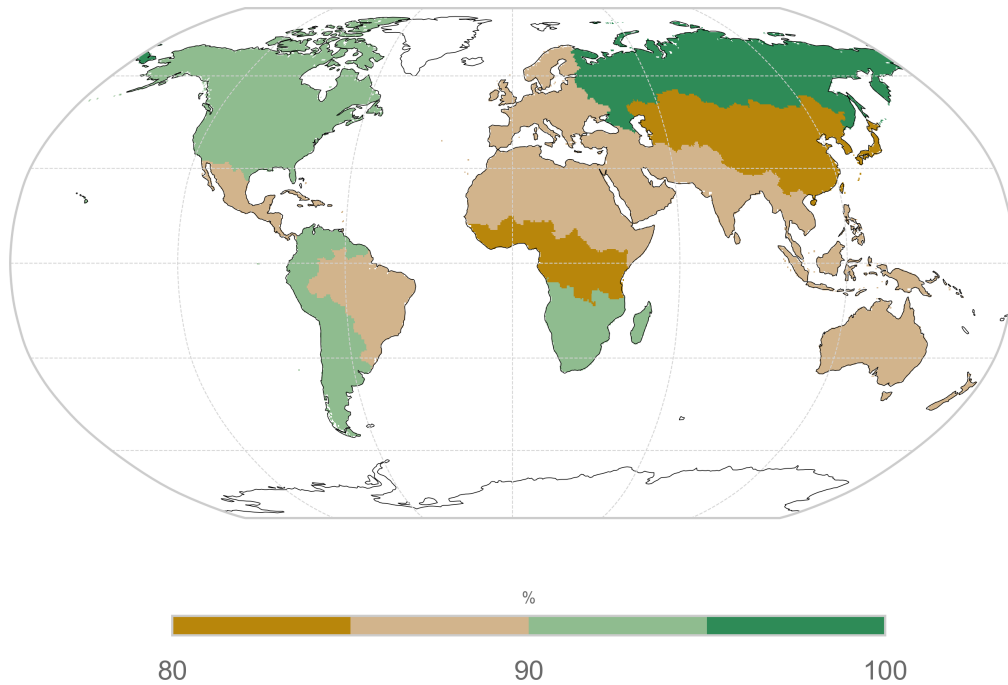

**Supplementary Figure 8: Regional accuracy of the data assimilation.** The figure shows the regionally averaged spatial agreement between a) the assimilated woody biomass carbon time series and b) the original woody biomass carbon time series by Xu *et al.* [2] for 2000-2019. The agreement (in %) is calculated as the number of years with the same trend (i.e., increase/decrease/no change in biomass carbon) for a) and b) divided by the total number of years.

a)

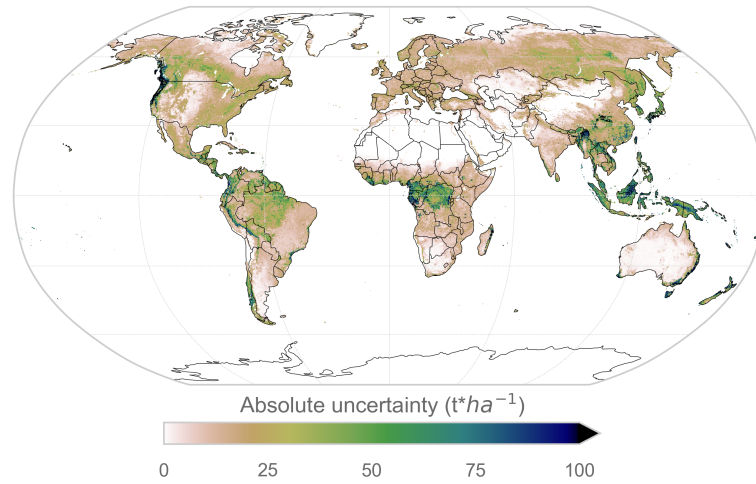

b)

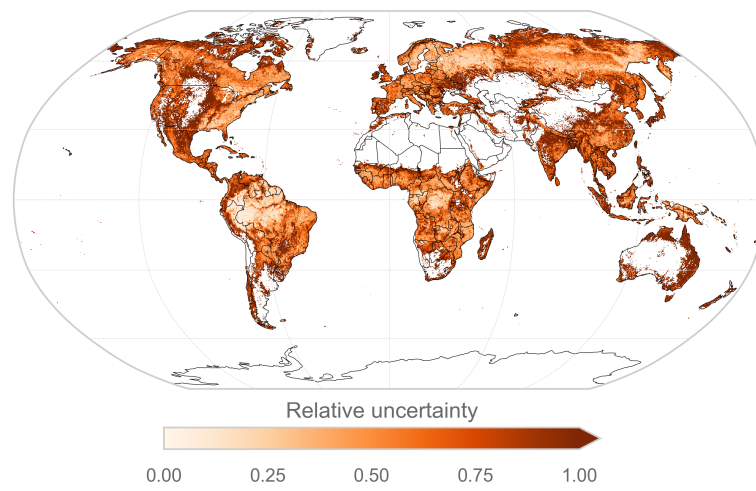

**Supplementary Figure 9:** Absolute (a) (in  $t \cdot ha^{-1}$ ) and relative (b) (as fraction of the original estimate) pixel-level uncertainty for biomass carbon densities, as estimated in Xu *et al.* [2].

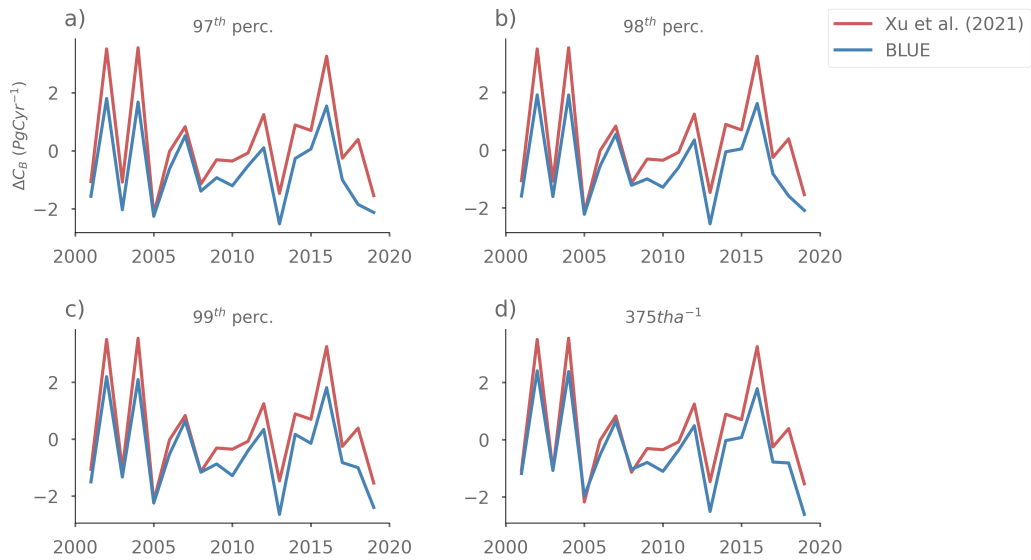

**Supplementary Figure 10: Evaluation of different percentile thresholds for excluding unrealistic biomass carbon densities.** Comparison of the annual change in global woody biomass carbon stocks ( $\Delta C_B$ ) between the assimilated BLUE time series resulting from different upper thresholds for excluding unrealistic woody biomass carbon densities and the original time series by Xu *et al.* [2]. The percentile-based thresholds are derived by cutting the distribution of woody biomass carbon densities smaller than  $375 \text{ tha}^{-1}$  to the respective percentiles and choosing the percentile values as upper thresholds for the exclusion of further grid cells. The resulting time series of change in woody biomass carbon stocks from the percentile approaches are shown in a-c and the time series based on an upper threshold of  $375 \text{ tha}^{-1}$  is shown in d.

| Flux by LULCC transition (PgC yr <sup>-1</sup> ) | Model simulation |            |              |
|--------------------------------------------------|------------------|------------|--------------|
|                                                  | BLUE_transient   | BLUE_fixed | BLUE_default |
| Clearing for pasture and cropland expansion      | 3.5              | 2.5        | 2.7          |
| Net flux from wood harvest                       | 1.4              | 0.7        | 0.6          |
| Abandonment of pasture and croplands             | -2.1             | -1.8       | -1.8         |
| Sum                                              | 2.8              | 1.4        | 1.5          |

**Supplementary Table 1:** Comparison of estimated global carbon flux from land use and land cover change for different transitions for 2000-2019. The numbers from this study (BLUE\_transient and BLUE\_fixed) represent the average from two threshold approaches (see "Threshold testing for excluding inconsistent woody biomass carbon densities").

| Dataset                  | Period    | Terrestrial biomass carbon sink ( $S_{\text{LAND,B}}$ ) |                                  |                 |
|--------------------------|-----------|---------------------------------------------------------|----------------------------------|-----------------|
|                          |           | Cumulative (PgC)                                        | Net flux (PgC yr <sup>-1</sup> ) | IAV of net flux |
| This study *•            | 2001-2019 | -29                                                     | -1.5                             | 1.0             |
| Xu <i>et al.</i> [2] •   | 2001-2019 | -93                                                     | -4.9                             | 0.4             |
| TRENDY v8 (S2) #         | 2001-2018 | -33±9                                                   | -1.9±0.5                         | 0.5±0.3         |
| Gasser <i>et al.</i> [3] | 2000-2018 | -22                                                     | -1.2                             | 0.8             |

• Estimate only includes woody biomass carbon

**Supplementary Table 2:** Comparison of the estimated global terrestrial biomass carbon sink from this study compared to a range of other recent studies. Interannual variability (IAV) is calculated as the ratio of the standard deviation (SD) to the mean. Error estimates are given as the mean of 13 DGVMs  $\pm 1$  SD for TRENDY (#) resp. as the mean from two threshold approaches (see "Threshold testing for excluding inconsistent woody biomass carbon densities") (\*). Note that, to avoid errors from the rounding of numbers in the table, percentage values in the main text were calculated from unrounded numbers.

| <b>Model</b>  | <b>Reference</b>            | <b>Available setups</b> |
|---------------|-----------------------------|-------------------------|
| CLASS-CTEM    | Melton & Arora [4]          | S2,S3,S5,S6             |
| CLM5.0        | Lawrence <i>et al.</i> [5]  | S2                      |
| DLEM          | Tian <i>et al.</i> [6]      | S2,S3,S5,S6             |
| JSBACH        | Mauritsen <i>et al.</i> [7] | S2,S3,S5,S6             |
| JULES-ES 1.02 | Sellar <i>et al.</i> [8]    | S2                      |
| LPJ-GUESS     | Smith <i>et al.</i> [9]     | S2,S3,S5,S6             |
| LPX-Bern      | Lienert & Joos [10]         | S2,S3,S5,S6             |
| OCN           | Zaehle <i>et al.</i> [11]   | S2                      |
| ORCHIDEE      | Krinner <i>et al.</i> [12]  | S2,S3,S5,S6             |
| ORCHIDEE CNP  | Goll <i>et al.</i> [13]     | S2,S3,S5,S6             |
| SDGVM         | Walker <i>et al.</i> [14]   | S2,S3,S5,S6             |
| CABLE-POP     | Haverd <i>et al.</i> [15]   | S2                      |
| ISAM          | Jain <i>et al.</i> [16]     | S2                      |

**Supplementary Table 3:** Overview of the simulation setups for the TRENDY DGVMs used in this analysis (adjusted from Obermeier *et al.* [17]).

| <b>LULCC transition</b> | <b>Handling Cdens on initially woody vegetation (PFT 1-8)</b>           |
|-------------------------|-------------------------------------------------------------------------|
| v to s                  | Xu et al. (2021) - PFT- and land cover type level                       |
| s to s                  | threshold approach - linear interpolation                               |
| v to c                  | Xu et al. (2021) - PFT- and land cover type level                       |
| v to p                  | threshold approach - linear interpolation                               |
| s to c                  | scaling to c and p acc. to Houghton ratios                              |
| s to p                  |                                                                         |
| c to p                  | Xu et al. (2021) - PFT- and land cover type level                       |
| p to c                  | threshold approach - linear interpolation                               |
| c to s                  | scaling to c and p acc. to Houghton ratios                              |
| p to s                  | interpolation for grid cells without v/s land cover upon initialization |

**Supplementary Table 4:** Handling of transitions on initially woody vegetation (black fonts show new steps introduced compared to upper rows). The land cover types are abbreviated as v: primary land (in BLUE "virgin"), s: secondary land, c: cropland and p: pasture.

15 **Supplementary Note 1. Assimilation of ob-**  
16 **served woody biomass carbon in BLUE**

17 *Threshold testing for excluding inconsistent woody biomass carbon densities*

18 We compare the assimilated woody biomass carbon densities resulting from  
19 different thresholds for excluding unrealistically high values at the beginning  
20 of each time step in BLUE to the original woody biomass carbon densities  
21 by Xu *et al.* [2]. We test various thresholds to account for uncertainties in-  
22 troduced by the choice of an upper threshold for unrealistic woody biomass  
23 carbon densities. The percentile thresholds (97<sup>th</sup>, 98<sup>th</sup> and 99<sup>th</sup> percentile)  
24 are applied to each year of the woody biomass carbon density time series  
25 that was generated by excluding all values larger than the maximum pixel-  
26 value of the time series by Xu *et al.* [2] (i.e., all values equal to or larger  
27 than 375  $\text{tha}^{-1}$ ). All woody biomass carbon densities that are equal to or  
28 exceed the chosen percentile threshold are excluded from the dataset and  
29 interpolated by means of linear barycentric interpolation. The fraction of  
30 excluded grid cells (related to the total number of grid cells: 720x1440 at  
31 0.25° resolution), including grid cells that were already excluded prior to the  
32 calculation of percentiles according to the 375  $\text{tha}^{-1}$  threshold ( $\sim 3\%$ ), varies  
33 from  $\sim 4\%$  (99<sup>th</sup> percentile) to  $\sim 6\%$  (97<sup>th</sup> percentile) over the entire time  
34 series. We evaluate each threshold by comparing the global biomass carbon  
35 trends (i.e., increase/decrease) of the assimilated time series to the original  
36 time series. Supplementary Fig. 10 shows that the trends of the assimi-  
37 lated woody biomass carbon time series start to diverge from the observed  
38 woody biomass carbon time series in recent years (especially 2014-2015 and  
39 2017-2018) for thresholds smaller than the 99<sup>th</sup> percentile. Consequently, we  
40 choose the 99<sup>th</sup> percentile as an additional threshold approach to the 375  
41  $\text{tha}^{-1}$  approach.



42 *Special assumptions*

43 Upon any LULCC transition, the woody biomass carbon density of the target  
44 cover type is zero if the area covered by the target cover type was zero upon  
45 initialization of BLUE. Consequently, - albeit a change in land use and/or  
46 land cover can occur at a later time - there would be no carbon transferred  
47 from the source land cover type to the target land cover type in the respective  
48 PFT. In those special cases, the actual biomass carbon density for the target  
49 land cover type in the respective PFT is calculated by scaling the actual  
50 biomass carbon density from the source land cover type in the respective  
51 PFT with the relation of source and target land cover type, taken from the  
52 Houghton *et al.* [18] carbon densities:

$$\rho_{Ba,j',l}(t) = \rho_{Ba,j,l}(t) * \frac{\rho_{B,j',l}}{\rho_{B,j,l}} \quad (1)$$

53 with  $j\{v, s, p, c\}; l\{1..8\}; t\{2000..2019\}$

54 *Handling of non-woody vegetation*  
55 Non-woody vegetation carbon (i.e., PFTs 9..11 or land cover type p,c) is  
56 excluded (i.e., initialized with zero) for non-woody PFTs in our simulation  
57 setups. The inclusion of carbon fluxes on non-woody vegetation types might  
58 be desirable to obtain holistic values for some carbon fluxes or to facilitate  
59 the comparison with other datasets (mainly relevant for  $E_{LUC}$  and  $C_B$  in our  
60 analysis). For those variables, we add the non-woody carbon fluxes from the  
61 "default" BLUE simulations with woody biomass carbon densities based on  
62 Houghton *et al.* [18] (but otherwise the same setup).  
63 However, there is still non-woody vegetation which needs to be directly con-  
64 sidered in our assimilated biomass carbon setups. This is the case for areas  
65 that are naturally vegetated by woody biomass (PFTs 1..8), but that were  
66 converted to non-woody land cover types (p,c) through LULCC and can  
67 return to woody vegetation again any time through abandonment (i.e., pas-  
68 ture/crop is converted to secondary land). Similarly, woody vegetation might  
69 be temporarily converted to non-woody vegetation through clearing for agri-  
70 culture or pasture. Consequently, we need biomass carbon density estimates  
71 for non-woody vegetation on areas where woody vegetation naturally grows.  
72 This is achieved by 1) scaling the "processed" (i.e., threshold approach and  
73 interpolation finished) woody biomass carbon densities for primary and sec-  
74 ondary land to crop and pasture according to the ratios from Houghton *et al.*  
75 [18] and 2) interpolating "missing" values, i.e., grid cells with no primary or  
76 secondary land cover upon initialization (only 1% of all grid cells over the  
77 entire time series). Supplementary Tab. 4 gives an overview of how each  
78 LULCC transition type is realized.

## 79 References

- 80 1. Pan, Y. *et al.* A large and persistent carbon sink in the world’s forests.  
81 *Science* **333**, 988–93. ISSN: 1095-9203 (Electronic) 0036-8075 (Linking)  
82 (2011).
- 83 2. Xu, L. *et al.* Changes in global terrestrial live biomass over the 21st  
84 century. *Sci Adv* **7**. ISSN: 2375-2548 (Electronic) 2375-2548 (Linking)  
85 (2021).
- 86 3. Gasser, T. *et al.* Historical CO<sub>2</sub> emissions from land use and land cover  
87 change and their uncertainty. *Biogeosciences* **17**, 4075–4101. ISSN: 1726-  
88 4189 (2020).
- 89 4. Melton, J. R. & Arora, V. K. Competition between plant functional  
90 types in the Canadian Terrestrial Ecosystem Model (CTEM) v.2.0. *Geo-  
91 scientific Model Development* **9**, 323–361. ISSN: 1991-9603 (2016).
- 92 5. Lawrence, D. M. *et al.* The Community Land Model Version 5: De-  
93 scription of New Features, Benchmarking, and Impact of Forcing Un-  
94 certainty. *Journal of Advances in Modeling Earth Systems* **11**, 4245–  
95 4287. ISSN: 1942-2466 1942-2466 (2019).
- 96 6. Tian, H. *et al.* North American terrestrial CO<sub>2</sub> uptake largely offset by  
97 CH<sub>4</sub> and N<sub>2</sub>O emissions: toward a full accounting of the greenhouse gas  
98 budget. *Clim Change* **129**, 413–426. ISSN: 0165-0009 (Print) 0165-0009  
99 (Linking) (2015).
- 100 7. Mauritsen, T. *et al.* Developments in the MPI-M Earth System Model  
101 version 1.2 (MPI-ESM1.2) and Its Response to Increasing CO<sub>2</sub>. *J Adv  
102 Model Earth Syst* **11**, 998–1038. ISSN: 1942-2466 (Print) 1942-2466 (Link-  
103 ing) (2019).
- 104 8. Sellar, A. A. *et al.* UKESM1: Description and Evaluation of the U.K.  
105 Earth System Model. *Journal of Advances in Modeling Earth Systems*  
106 **11**, 4513–4558. ISSN: 1942-2466 1942-2466 (2019).
- 107 9. Smith, B. *et al.* Implications of incorporating N cycling and N limita-  
108 tions on primary production in an individual-based dynamic vegetation  
109 model. *Biogeosciences* **11**, 2027–2054. ISSN: 1726-4189 (2014).
- 110 10. Lienert, S. & Joos, F. A Bayesian ensemble data assimilation to con-  
111 strain model parameters and land-use carbon emissions. *Biogeosciences*  
112 **15**, 2909–2930. ISSN: 1726-4189 (2018).

- 113 11. Zaehle, S., Ciais, P., Friend, A. D. & Prieur, V. Carbon benefits of an-  
114 thropogenic reactive nitrogen offset by nitrous oxide emissions. *Nature*  
115 *Geoscience* **4**, 601–605. ISSN: 1752-0894 1752-0908 (2011).
- 116 12. Krinner, G. *et al.* A dynamic global vegetation model for studies of  
117 the coupled atmosphere-biosphere system. *Global Biogeochemical Cycles*  
118 **19**. ISSN: 08866236 (2005).
- 119 13. Goll, D. S. *et al.* A representation of the phosphorus cycle for OR-  
120 CHIDEE (revision 4520). *Geoscientific Model Development* **10**, 3745–  
121 3770. ISSN: 1991-9603 (2017).
- 122 14. Walker, A. P. *et al.* The impact of alternative trait-scaling hypotheses  
123 for the maximum photosynthetic carboxylation rate ( $V_{cmax}$ ) on global  
124 gross primary production. *New Phytol* **215**, 1370–1386. ISSN: 1469-8137  
125 (Electronic) 0028-646X (Linking) (2017).
- 126 15. Haverd, V., Smith, B., Nieradzick, L. P. & Briggs, P. R. A stand-alone  
127 tree demography and landscape structure module for Earth system  
128 models: integration with inventory data from temperate and boreal  
129 forests. *Biogeosciences* **11**, 4039–4055. ISSN: 1726-4189 (2014).
- 130 16. Jain, A. K., Kheshgi, H. S. & Wuebbles, D. J. A globally aggregated  
131 reconstruction of cycles of carbon and its isotopes. *Tellus B: Chemical*  
132 *and Physical Meteorology* **48**, 583–600. ISSN: 1600-0889 (2017).
- 133 17. Obermeier, W. A. *et al.* Modelled land use and land cover change emis-  
134 sions – a spatio-temporal comparison of different approaches. *Earth Sys-*  
135 *tem Dynamics* **12**, 635–670. ISSN: 2190-4987 (2021).
- 136 18. Houghton, R. A. *et al.* Changes in the Carbon Content of Terrestrial  
137 Biota and Soils between 1860 and 1980: A Net Release of CO<sub>2</sub> to  
138 the Atmosphere. *Ecological Monographs* **53**, 235–262. ISSN: 0012-9615  
139 1557-7015 (1983).
